# Supplementary material for: Diagnosis and Treatment of Japanese Children with Neurogenic Bladder: Analysis of Data from a National Health Insurance Database
Source: MDPI journal article supplement (doi:10.3390/jcm12093191), 2023-04-28
Supplement: s1 [file s1]

## SUPPLEMENTARY MATERIAL

**Supplementary Table S1. Neurogenic bladder and overactive bladder diagnosis**

| Classification | ICD10 Small Classification | ICD10 Small Classification Name                                | ICD10 Sub Classification | ICD10 Sub Classification Name                             | Disease Name                                                                                    |
|----------------|----------------------------|----------------------------------------------------------------|--------------------------|-----------------------------------------------------------|-------------------------------------------------------------------------------------------------|
| NGB            | N31                        | Neuromuscular dysfunction of bladder, not elsewhere classified | N310                     | Uninhibited neuropathic bladder, not elsewhere classified | • Uninhibited neurogenic bladder                                                                |
|                |                            |                                                                | N311                     | Reflex neuropathic bladder, not elsewhere classified      | • Reflex neurogenic bladder                                                                     |
|                |                            |                                                                | N312                     | Flaccid neuropathic bladder, not elsewhere classified     | • Atonic neurogenic bladder<br>• Autonomous neurogenic bladder<br>• Hypotonic bladder           |
|                |                            |                                                                | N319                     | Neuromuscular dysfunction of bladder, unspecified         | • Bladder and rectal disturbance<br>• Neurogenic bladder<br>• Postoperative bladder dysfunction |
| OAB            | N32                        | Other disorders of bladder                                     | N328                     | Other specified disorders of bladder                      | • Overactive bladder                                                                            |

ICD, International Classification of Diseases; NGB, neurogenic bladder; OAB, overactive bladder

**Supplementary Table 2. OAB drug codes**

| ATC codes | Code Descriptions                     | General Names                                                                                                                                                                                                                               | Drug Categories         |
|-----------|---------------------------------------|---------------------------------------------------------------------------------------------------------------------------------------------------------------------------------------------------------------------------------------------|-------------------------|
| G04D4     | Urinary incontinence products         | <ul style="list-style-type: none"> <li>• Imidafenacin</li> <li>• Oxybutynin hydrochloride</li> <li>• Solifenacin succinate</li> <li>• Tolterodine tartrate</li> <li>• Fesoterodine fumarate</li> <li>• Propiverine hydrochloride</li> </ul> | • Anticholinergic drugs |
|           |                                       | <ul style="list-style-type: none"> <li>• Vibegron</li> <li>• Mirabegron</li> </ul>                                                                                                                                                          | • Beta 3-agonists       |
| G04D4     | Urinary incontinence products         | Flavoxate hydrochloride                                                                                                                                                                                                                     | • Other (oral agents)   |
| M03A      | Muscle relaxants, peripherally acting | Botulinum toxin type A                                                                                                                                                                                                                      | • Other (injections)    |

ATC, Anatomical Therapeutic Chemical Classification; OAB, overactive bladder

**Supplementary Table 3. Neurological disease diagnosis codes**

| Classification | ICD10 Small Classification | ICD10 Small Classification Name                   | ICD10 Sub Classification | ICD10 Sub Classification Name               | Disease Name                                                                                                                                                                                                                                                                      |
|----------------|----------------------------|---------------------------------------------------|--------------------------|---------------------------------------------|-----------------------------------------------------------------------------------------------------------------------------------------------------------------------------------------------------------------------------------------------------------------------------------|
| Spina bifida   | Q05                        | Spina bifida                                      | Q055                     | Cervical spina bifida without hydrocephalus | <ul style="list-style-type: none"> <li>• intracranial dermal sinus</li> </ul>                                                                                                                                                                                                     |
|                |                            |                                                   | Q056                     | Thoracic spina bifida without hydrocephalus | <ul style="list-style-type: none"> <li>• dorsal spina bifida</li> <li>• thoracolumbar spina bifida</li> </ul>                                                                                                                                                                     |
|                |                            |                                                   | Q057                     | Lumbar spina bifida without hydrocephalus   | <ul style="list-style-type: none"> <li>• lumbosacral dermal sinus</li> <li>• lumbosacral spina bifida</li> <li>• rupture of lumbar spinal meningocele</li> </ul>                                                                                                                  |
|                |                            |                                                   | Q058                     | Sacral spina bifida without hydrocephalus   | <ul style="list-style-type: none"> <li>• sacral spina bifida</li> </ul>                                                                                                                                                                                                           |
|                |                            |                                                   | Q059                     | Spina bifida, unspecified                   | <ul style="list-style-type: none"> <li>• araphia</li> <li>• dermal sinus</li> <li>• hydromeningocele</li> <li>• limbus vertebra</li> <li>• meningocele</li> <li>• myelocele</li> <li>• myelomeningocele</li> <li>• rachischisis</li> <li>• spinal cord lipomeningocele</li> </ul> |
|                | Q76                        | Congenital malformations of spine and bony thorax | Q760                     | Spina bifida occulta                        | <ul style="list-style-type: none"> <li>• spina bifida occulta</li> </ul>                                                                                                                                                                                                          |
| Hydrocephalus  | Q03                        | Congenital hydrocephalus                          | Q030                     | Malformations of aqueduct of Sylvius        | <ul style="list-style-type: none"> <li>• aqueduct stenosis</li> <li>• congenital aqueduct of Sylvius anomaly</li> </ul>                                                                                                                                                           |

| Classification     | ICD10 Small Classification | ICD10 Small Classification Name                      | ICD10 Sub Classification | ICD10 Sub Classification Name               | Disease Name                                                                                                                                                                                                           |
|--------------------|----------------------------|------------------------------------------------------|--------------------------|---------------------------------------------|------------------------------------------------------------------------------------------------------------------------------------------------------------------------------------------------------------------------|
|                    |                            |                                                      | Q031                     | Atresia of foramina of Magendie and Luschka | • Dandy-Walker syndrome                                                                                                                                                                                                |
|                    |                            |                                                      | Q038                     | Other congenital hydrocephalus              | • foramen of Monroe obstruction                                                                                                                                                                                        |
|                    |                            |                                                      | Q039                     | Congenital hydrocephalus, unspecified       | • X-linked hydrocephalus<br>• congenital hydrocephalus<br>• neonatal hydrocephaly                                                                                                                                      |
|                    | Q05                        | Spina bifida                                         | Q054                     | Unspecified spina bifida with hydrocephalus | • meningocele with hydrocephalus                                                                                                                                                                                       |
| Spinal cord injury | T09                        | Other injuries of spine and trunk, level unspecified | T093                     | Injury of spinal cord, level unspecified    | • spinal cord concussion<br>• spinal cord contusion<br>• spinal cord hematoma<br>• spinal cord incomplete injury<br>• spinal cord injury<br>• spinal epidural hematoma<br>• spinal shock<br>• spinal transverse injury |
| Cerebral palsy     | G80                        | Cerebral palsy                                       | G800                     | Spastic quadriplegic cerebral palsy         | • congenital spastic paralysis<br>• spastic spinal paralysis                                                                                                                                                           |
|                    |                            |                                                      | G801                     | Spastic diplegic cerebral palsy             | • cerebral diplegia<br>• cerebral paraplegia                                                                                                                                                                           |
|                    |                            |                                                      | G802                     | Spastic hemiplegic cerebral palsy           | • congenital hemiplegia<br>• infantile hemiplegia<br>• pediatric hemiplegia                                                                                                                                            |

| Classification | ICD10<br>Small<br>Classification | ICD10<br>Small Classification<br>Name          | ICD10<br>Sub<br>Classification | ICD10<br>Sub Classification<br>Name    | Disease Name                                                                                                                                                                                                                                                                                                                                        |
|----------------|----------------------------------|------------------------------------------------|--------------------------------|----------------------------------------|-----------------------------------------------------------------------------------------------------------------------------------------------------------------------------------------------------------------------------------------------------------------------------------------------------------------------------------------------------|
|                |                                  |                                                | G803                           | Dyskinetic cerebral palsy              | <ul style="list-style-type: none"> <li>• athetoid cerebral palsy</li> <li>• congenital athetosis</li> <li>• congenital chorea</li> <li>• double athetosis</li> <li>• double athetosis</li> <li>• dyskinetic cerebral palsy</li> </ul>                                                                                                               |
|                |                                  |                                                | G804                           | Ataxic cerebral palsy                  | <ul style="list-style-type: none"> <li>• ataxic cerebral palsy</li> </ul>                                                                                                                                                                                                                                                                           |
|                |                                  |                                                | G808                           | Other cerebral palsy                   | <ul style="list-style-type: none"> <li>• atonic cerebral palsy</li> <li>• congenital paraplegia</li> <li>• congenital quadriplegia</li> <li>• mixed cerebral palsy syndrome</li> </ul>                                                                                                                                                              |
|                |                                  |                                                | G809                           | Cerebral palsy, unspecified            | <ul style="list-style-type: none"> <li>• Little disease</li> <li>• cerebral palsy</li> </ul>                                                                                                                                                                                                                                                        |
| Meningitis     | G03                              | Meningitis due to other and unspecified causes | G030                           | Nonpyogenic meningitis                 | <ul style="list-style-type: none"> <li>• aseptic meningitis</li> </ul>                                                                                                                                                                                                                                                                              |
|                |                                  |                                                | G031                           | Chronic meningitis                     | <ul style="list-style-type: none"> <li>• chronic meningitis</li> </ul>                                                                                                                                                                                                                                                                              |
|                |                                  |                                                | G032                           | Benign recurrent meningitis [Mollaret] | <ul style="list-style-type: none"> <li>• Mollaret meningitis</li> </ul>                                                                                                                                                                                                                                                                             |
|                |                                  |                                                | G039                           | Meningitis, unspecified                | <ul style="list-style-type: none"> <li>• adhesive arachnoiditis</li> <li>• arachnoiditis</li> <li>• hypertrophic pachymeningitis</li> <li>• leptomeningitis</li> <li>• meningitis</li> <li>• occlusive meningitis</li> <li>• optical neuromeningitis</li> <li>• pachymeningitis</li> <li>• pseudomeningitis</li> <li>• spinal meningitis</li> </ul> |

| Classification | ICD10<br>Small<br>Classification | ICD10<br>Small Classification<br>Name                                          | ICD10<br>Sub<br>Classification | ICD10<br>Sub Classification<br>Name                                                                  | Disease Name                                                                                                                                                                                                                                                                                                                                                                                                             |
|----------------|----------------------------------|--------------------------------------------------------------------------------|--------------------------------|------------------------------------------------------------------------------------------------------|--------------------------------------------------------------------------------------------------------------------------------------------------------------------------------------------------------------------------------------------------------------------------------------------------------------------------------------------------------------------------------------------------------------------------|
| Brain tumor    | D43                              | Neoplasm of uncertain or unknown behaviour of brain and central nervous system | D430                           | Neoplasm of uncertain or unknown behaviour of brain and central nervous system/Brain, supratentorial | <ul style="list-style-type: none"> <li>• diencephalic tumor</li> <li>• frontal lobe tumor</li> <li>• hypothalamic neoplasm</li> <li>• occipital lobe tumor</li> <li>• parasellar tumor</li> <li>• parietal lobe tumor</li> <li>• supratentorial brain tumor</li> <li>• temporal lobe tumor</li> <li>• thalamic tumor</li> <li>• third ventricle tumor</li> </ul>                                                         |
|                |                                  |                                                                                | D431                           | Neoplasm of uncertain or unknown behaviour of brain and central nervous system/Brain, infratentorial | <ul style="list-style-type: none"> <li>• brainstem tumor</li> <li>• bulbar hemangioblastoma</li> <li>• bulbar tumor</li> <li>• cerebellar hemangioblastoma</li> <li>• cerebellar neoplasm</li> <li>• cerebellar vermis tumor</li> <li>• cerebellopontine angle tumor</li> <li>• foramen magnum tumor</li> <li>• fourth ventricle tumor</li> <li>• infratentorial brain tumor</li> <li>• posterior fossa tumor</li> </ul> |

| Classification | ICD10<br>Small<br>Classification | ICD10<br>Small Classification<br>Name | ICD10<br>Sub<br>Classification | ICD10<br>Sub Classification<br>Name                                                               | Disease Name                                                                                                                                                                                                                                                                                                                                                                                                                         |
|----------------|----------------------------------|---------------------------------------|--------------------------------|---------------------------------------------------------------------------------------------------|--------------------------------------------------------------------------------------------------------------------------------------------------------------------------------------------------------------------------------------------------------------------------------------------------------------------------------------------------------------------------------------------------------------------------------------|
|                |                                  |                                       | D432                           | Neoplasm of uncertain or unknown behaviour of brain and central nervous system/Brain, unspecified | <ul style="list-style-type: none"> <li>• brain tumor</li> <li>• congenital brain tumor</li> <li>• cranial nerve neoplasm</li> <li>• dysembryoplastic neuroepithelial tumor</li> <li>• intracranial teratoma</li> <li>• intraventricular tumor</li> <li>• multiple brain tumor</li> <li>• myxopapillary ependymoma</li> <li>• papillary ependymoma</li> <li>• subependymal giant cell astrocytoma</li> <li>• subependymoma</li> </ul> |
|                |                                  |                                       | D433                           | Neoplasm of uncertain or unknown behaviour of brain and central nervous system/Cranial nerves     | <ul style="list-style-type: none"> <li>• acoustic neuroma</li> <li>• chiasmal tumor</li> <li>• olfactory tumor</li> <li>• optic disc tumor</li> <li>• optic nerve neoplasm</li> </ul>                                                                                                                                                                                                                                                |

| Classification | ICD10<br>Small<br>Classification | ICD10<br>Small Classification<br>Name        | ICD10<br>Sub<br>Classification | ICD10<br>Sub Classification<br>Name                                                        | Disease Name                                                                                                                                                                                                                                                                                                                                                                                                                                     |
|----------------|----------------------------------|----------------------------------------------|--------------------------------|--------------------------------------------------------------------------------------------|--------------------------------------------------------------------------------------------------------------------------------------------------------------------------------------------------------------------------------------------------------------------------------------------------------------------------------------------------------------------------------------------------------------------------------------------------|
|                |                                  |                                              | D434                           | Neoplasm of uncertain or unknown behaviour of brain and central nervous system/Spinal cord | <ul style="list-style-type: none"> <li>• intramedullary spinal cord tumor</li> <li>• cauda equina tumor</li> <li>• cervical cord tumor</li> <li>• dumbbell shaped tumor</li> <li>• extradural spinal cord tumor</li> <li>• intraspinal teratoma</li> <li>• intraspinal tumor</li> <li>• spinal cord tumor</li> <li>• spinal hemangioblastoma</li> <li>• spinal intradural-extramedullary angioblastoma</li> <li>• thoracic cord tumor</li> </ul> |
| Myelitis       | G04                              | Encephalitis, myelitis and encephalomyelitis | G040                           | Acute disseminated encephalitis                                                            | <ul style="list-style-type: none"> <li>• acute disseminated encephalomyelitis</li> <li>• postvaccinal encephalomyelitis</li> <li>• vaccination encephalitis</li> </ul>                                                                                                                                                                                                                                                                           |
|                |                                  |                                              | G042                           | Bacterial meningoencephalitis and meningomyelitis, not elsewhere classified                | <ul style="list-style-type: none"> <li>• purulent cerebral meningitis</li> <li>• purulent myelitis</li> </ul>                                                                                                                                                                                                                                                                                                                                    |
|                |                                  |                                              | G048                           | Other encephalitis, myelitis and encephalomyelitis                                         | <ul style="list-style-type: none"> <li>• Rasmussen's encephalitis</li> <li>• acute cerebellar ataxia</li> <li>• anti-NMDA receptor encephalitis</li> <li>• atopic myelitis</li> <li>• autoimmune limbic encephalitis</li> <li>• postinfectious encephalitis</li> <li>• postinfectious encephalomyelitis</li> </ul>                                                                                                                               |



| Classification | ICD10<br>Small<br>Classification | ICD10<br>Small Classification<br>Name                        | ICD10<br>Sub<br>Classification | ICD10<br>Sub Classification<br>Name                                                | Disease Name                                                                                                                                                                                                                                                                                                                                                                                                                                                                                                              |
|----------------|----------------------------------|--------------------------------------------------------------|--------------------------------|------------------------------------------------------------------------------------|---------------------------------------------------------------------------------------------------------------------------------------------------------------------------------------------------------------------------------------------------------------------------------------------------------------------------------------------------------------------------------------------------------------------------------------------------------------------------------------------------------------------------|
|                |                                  |                                                              | G049                           | Encephalitis, myelitis and<br>encephalomyelitis,<br>unspecified                    | <ul style="list-style-type: none"> <li>• acute ascending myelitis</li> <li>• acute myelitis</li> <li>• chronic encephalitis</li> <li>• chronic myelitis</li> <li>• compression myelitis</li> <li>• encephalitis</li> <li>• encephalomyelitis</li> <li>• limbic encephalitis</li> <li>• meningoencephalitis</li> <li>• meningomyelitis</li> <li>• myelitis</li> <li>• myelomeningitis</li> <li>• polymyeloradiculitis</li> <li>• sclerosing myelitis</li> <li>• secondary encephalitis</li> <li>• ventriculitis</li> </ul> |
|                | G37                              | Other demyelinating<br>diseases of central<br>nervous system | G373                           | Acute transverse myelitis<br>in demyelinating disease<br>of central nervous system | <ul style="list-style-type: none"> <li>• acute transverse myelitis</li> <li>• transverse myelitis</li> </ul>                                                                                                                                                                                                                                                                                                                                                                                                              |
|                |                                  |                                                              |                                |                                                                                    |                                                                                                                                                                                                                                                                                                                                                                                                                                                                                                                           |

ICD, International Classification of Diseases

**Supplementary Table 4. Diagnoses in the non-spina bifida cohort (n = 651)**

| <b>Diagnosis</b>                         | <b>n</b> | <b>%</b> |
|------------------------------------------|----------|----------|
| Cerebral palsy                           | 475      | 73.0     |
| Brain tumor                              | 50       | 7.7      |
| Meningitis                               | 47       | 7.2      |
| Myelitis                                 | 22       | 3.4      |
| Hydrocephalus/cerebral palsy             | 16       | 2.5      |
| Hydrocephalus                            | 10       | 1.5      |
| Cerebral palsy/brain tumor               | 8        | 1.2      |
| Cerebral palsy/myelitis                  | 6        | 0.9      |
| Spinal cord injury                       | 4        | 0.6      |
| Cerebral palsy/meningitis/myelitis       | 3        | 0.5      |
| Spinal cord injury/brain tumor           | 2        | 0.3      |
| Meningitis/myelitis                      | 2        | 0.3      |
| Brain tumor/myelitis                     | 2        | 0.3      |
| Hydrocephalus/cerebral palsy/meningitis  | 1        | 0.2      |
| Hydrocephalus/cerebral palsy/brain tumor | 1        | 0.2      |
| Spinal cord injury/cerebral palsy        | 1        | 0.2      |
| Spinal cord injury/meningitis            | 1        | 0.2      |
